# Supplementary material for: Environmentally benign and energy efficient methodology for condensation: an interesting facet to the classical Perkin reaction
Source: Royal Society of Chemistry journal article supplement (doi:10.1039/c0gc00712a), 2011-01-01

## Appendix I: Energy calculations

### *Energy delivered during 9 hours for Cinnamic acid formation reaction by conventional method*

- Voltage input in magnetic stirrer (Model MR 3001K, Heidolph Instruments, Schwabach, Germany) = 230 V
- Current measured using digital multimeter (KUSAM-MECO Model 2718, Kusam Electrical Industries Ltd., Mumbai, India) = 43 mA
- Power input in magnetic stirrer = Voltage input x Current measured  
= 230 (V) x 43 (mA) x 10<sup>-3</sup>(A/mA)  
  
= 9.8 W (J/s)
- Efficiency of magnetic stirrer taken for the calculation = 40% (estimated independently using calorimetric studies)
- Actual power input in stirrer = Power input in magnetic stirrer (W) x 40/100  
= 9.8 (W) x 40/100  
= 3.96 W (J/s)
- Time required for completion of reaction = 9 hours ( 32400 Seconds)
- Net energy delivered during 9 hours = Power input in magnetic stirrer x Time required for completion of reaction  
= 3.96 J/s x 9 hr x 3600 s/hr  
  
= 128304 J = 128.31 kJ
- Quantity of material processed = Quantity of benzaldehyde + Quantity of acetic anhydride + Quantity of sodium acetate trihydrate
- = 0.5g + 0.96g + 1.93g
- = 3.39g
- **Net energy supplied for processing of material during 9 hours** = Net energy delivered during 9 hours / Quantity of material processed  
= 128.31 (kJ) / 3.39 (g)  
  
= 37.85 (kJ/g)..... (A)

### 2 *Energy delivered during 4 hours for Cinnamic acid formation reaction By using DES*

- Voltage input in magnetic stirrer (Model MR 3001K, Heidolph Instruments, Schwabach, Germany) = 230 V
- Current measured using digital multimeter (KUSAM-MECO Model 2718, Kusam Electrical Industries Ltd., Mumbai, India) = 43 mA

- Power input in magnetic stirrer = Voltage input x Current measured  
 $= 230 \text{ (V)} \times 43 \text{ (mA)} \times 10^{-3} \text{ (A/mA)}$   
 $= 9.8 \text{ W (J/s)}$
  - Efficiency of magnetic stirrer taken for the calculation = 40% (estimated independently using calorimetric studies)
  - Actual power input in stirrer = Power input in magnetic stirrer (W) x 40/100  
 $= 9.8 \text{ (W)} \times 40/100$   
 $= 3.96 \text{ W (J/s)}$
  - Time required for completion of reaction = 4hours ( 14400 Seconds)
  - Net energy delivered during 9 hours = Power input in magnetic stirrer x Time required for completion of reaction  
 $= 3.96 \text{ J/s} \times 4 \text{ hr} \times 3600 \text{ s/hr}$   
 $= 57024 \text{ J} = 57.02 \text{ kJ}$
  - Quantity of material processed = Quantity of benzaldehyde + Quantity of acetic anhydride + Quantity of Deep Eutectic Solvent
  - $= 0.5\text{g} + 0.48\text{g} + 3.05\text{g}$
  - $= 4.03\text{g}$
  - **Net energy supplied for processing of material during 4 hours** = Net energy delivered during 4 hours / Quantity of material processed  
 $= 57.02 \text{ (kJ)} / 4.03 \text{ (g)}$   
 $= 14.15 \text{ (kJ/g)} \dots\dots\dots \text{ (B)}$
- 3 Net Energy saved for the Oxidation process = Net energy supplied for processing of material during 16 hours (A) – Net energy supplied for processing of material during 4 hours (B)  
 $= 37.85 - 14.15 \text{ (kJ/g)}$   
 $= 23.70 \text{ (kJ/g)}$

## Appendix 2. Reaction mechanism

Probable mechanism is given below:

DES is basic in nature. There is hydrogen bonding between  $\text{Cl}^-$  and hydrogen of urea. Therefore the basicity of that nitrogen increases and it can hold the proton of acetic anhydride. There may be formation of 4-membered cyclic transition state as shown in mechanism.

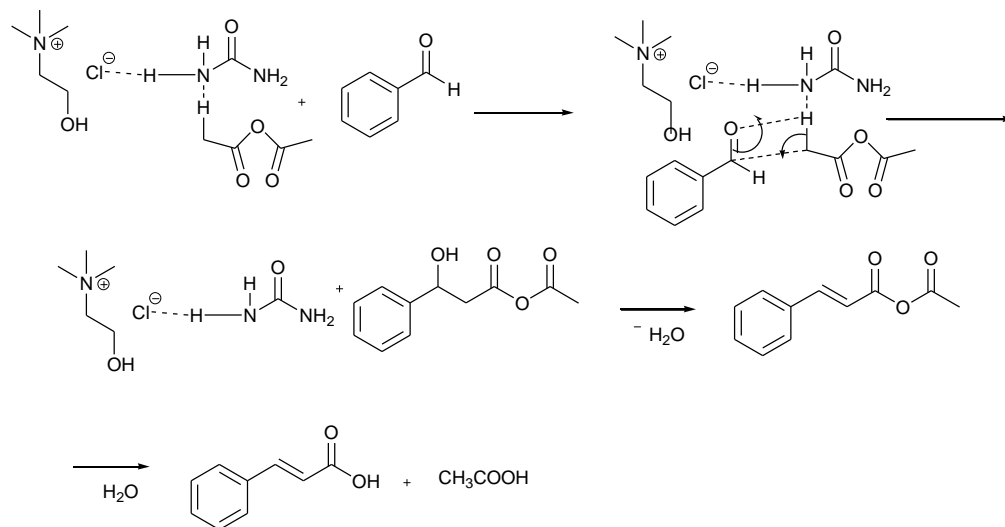

### Mass Spectrum

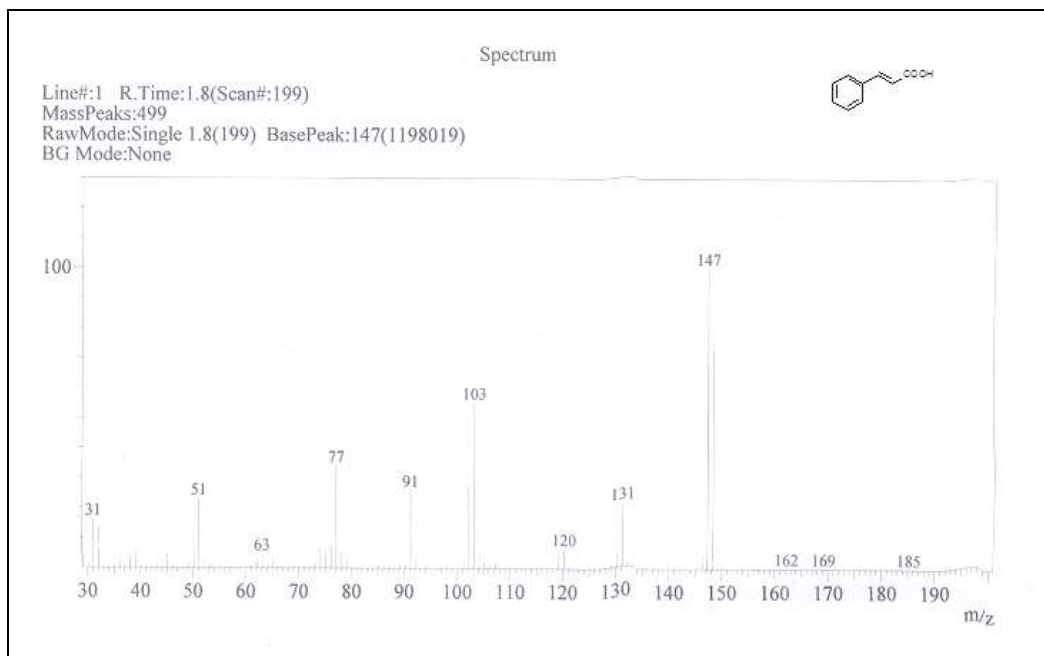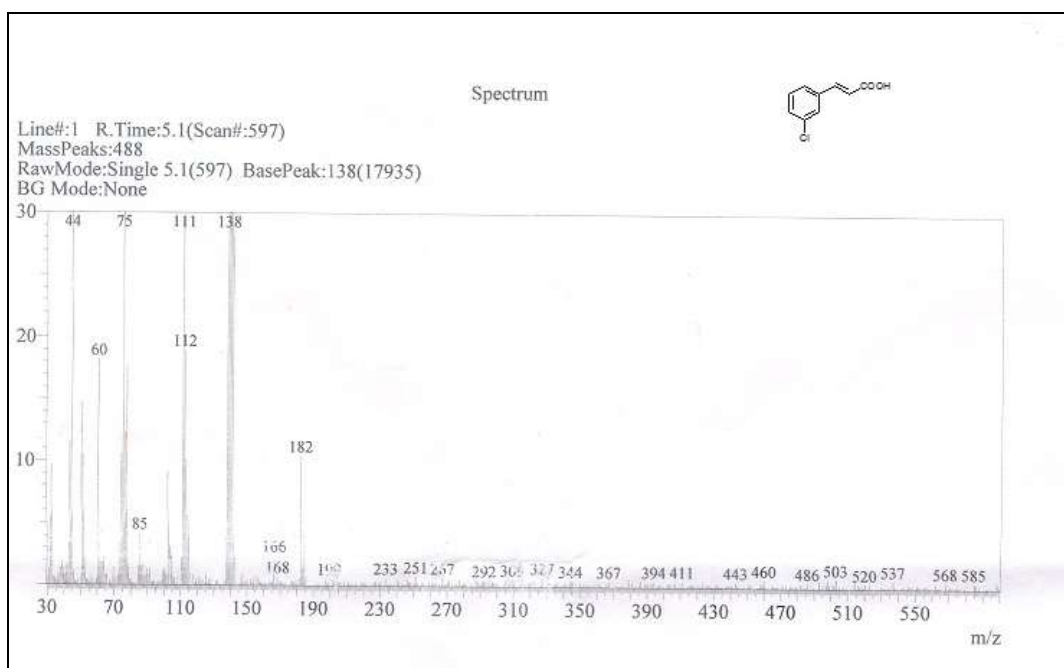

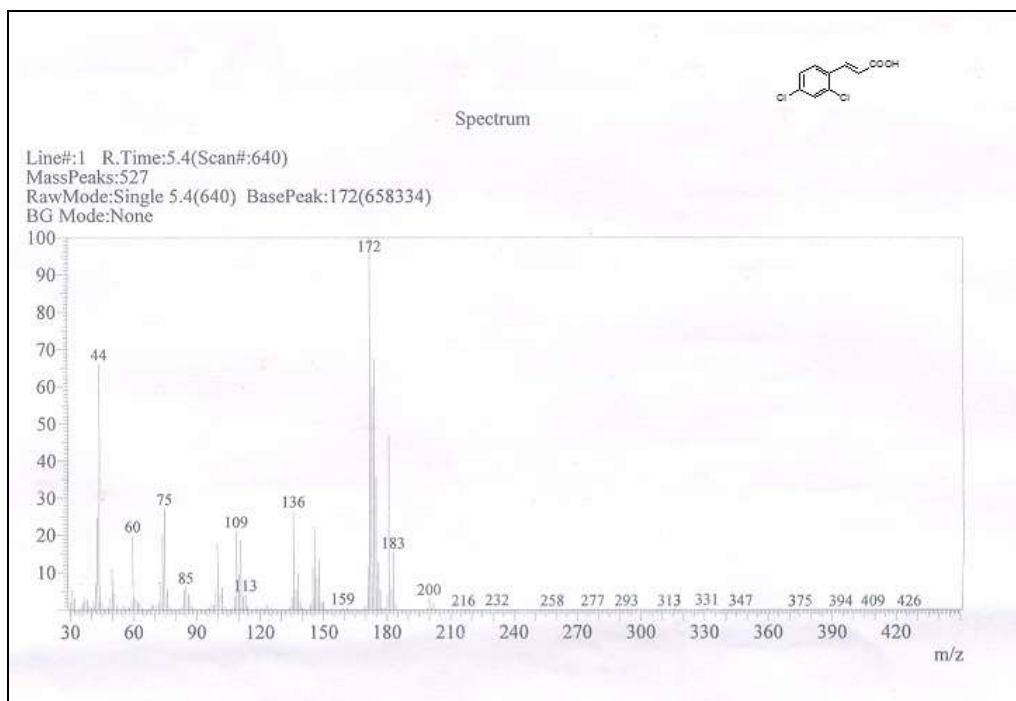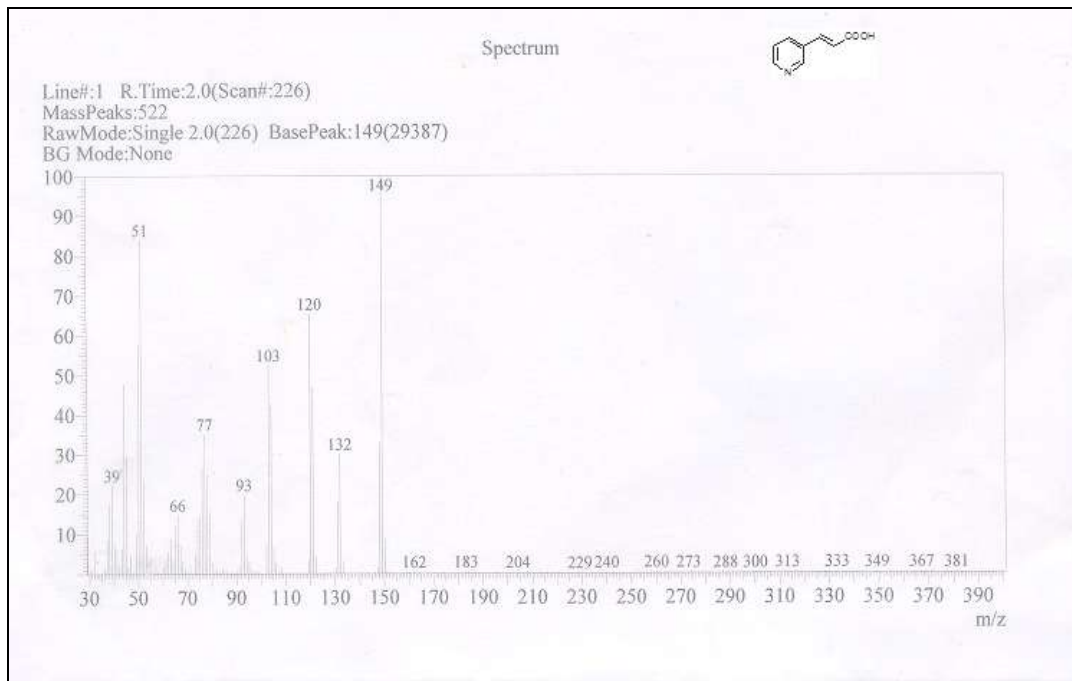

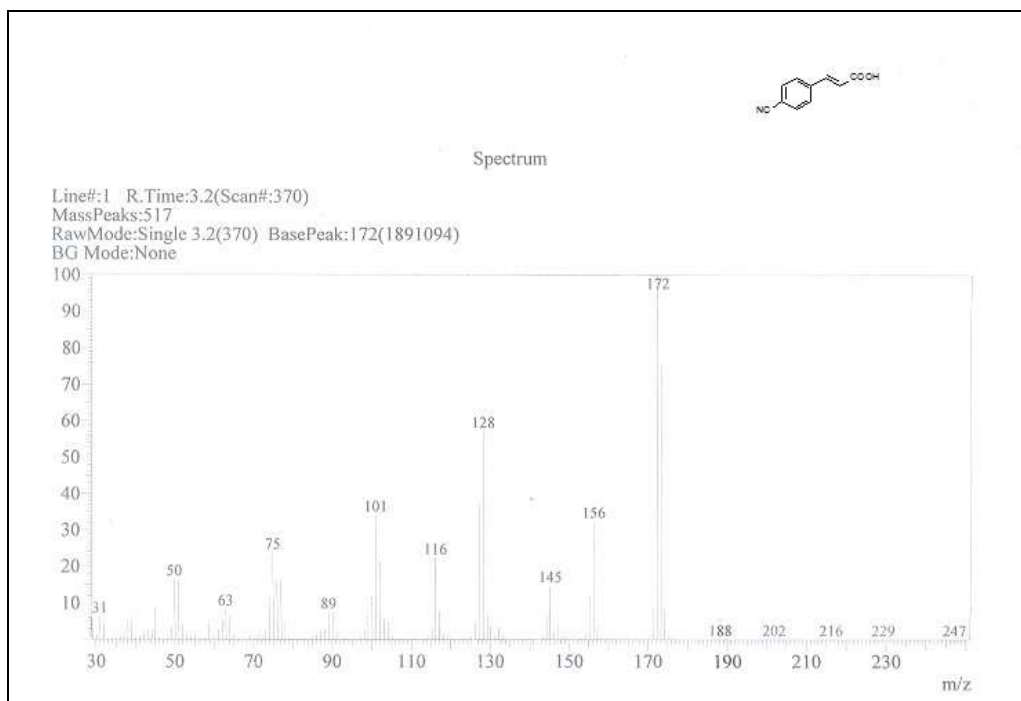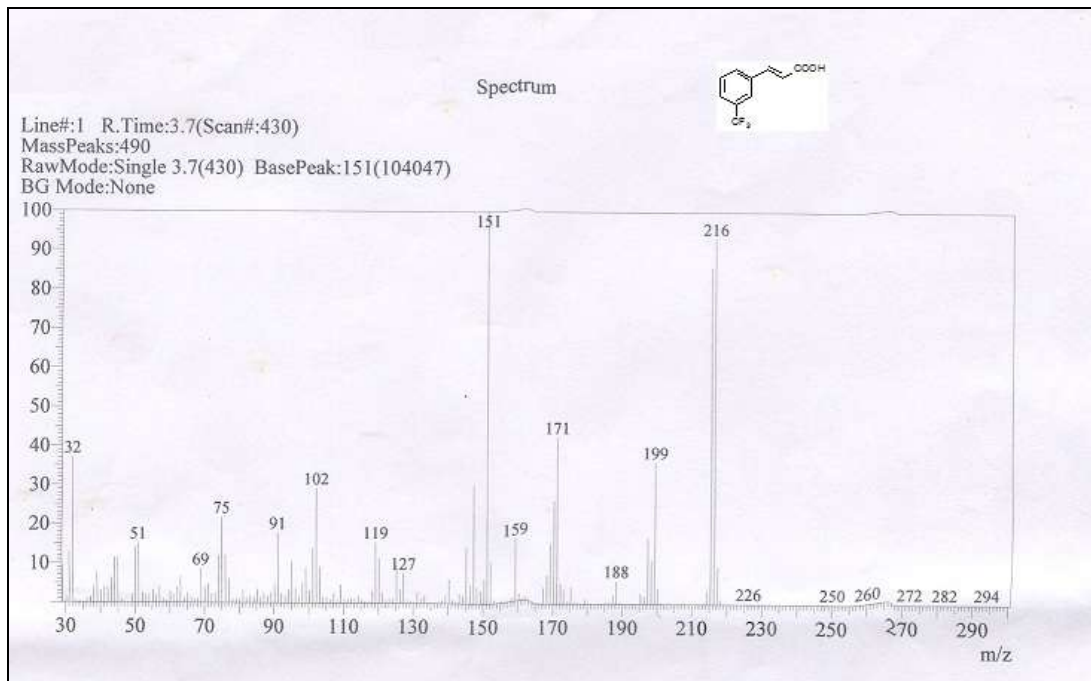

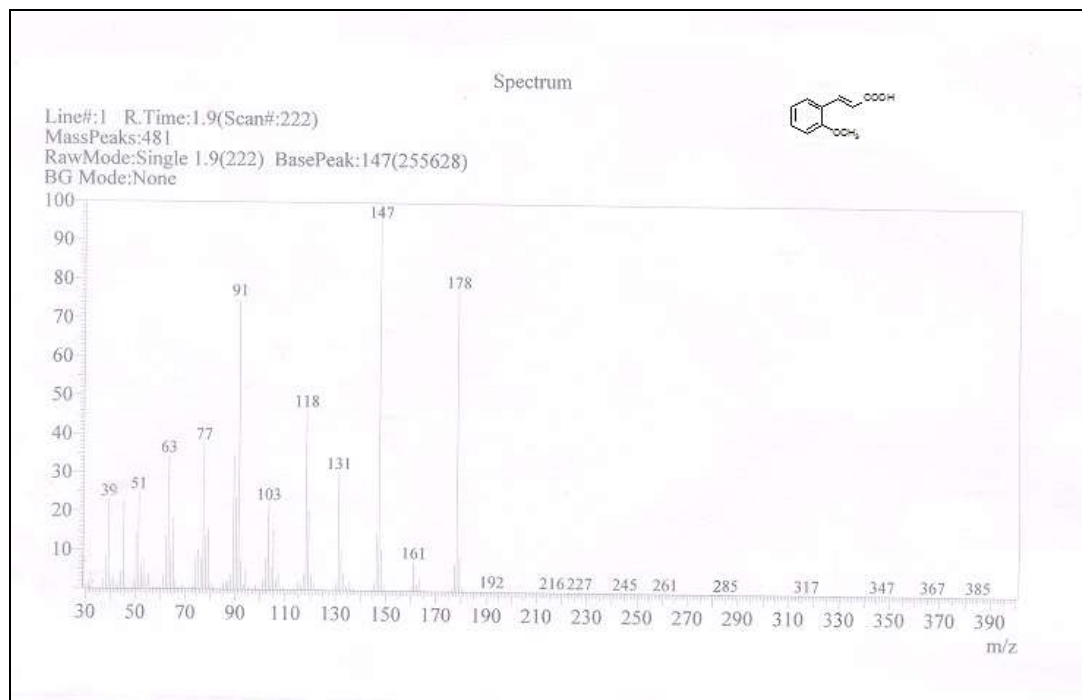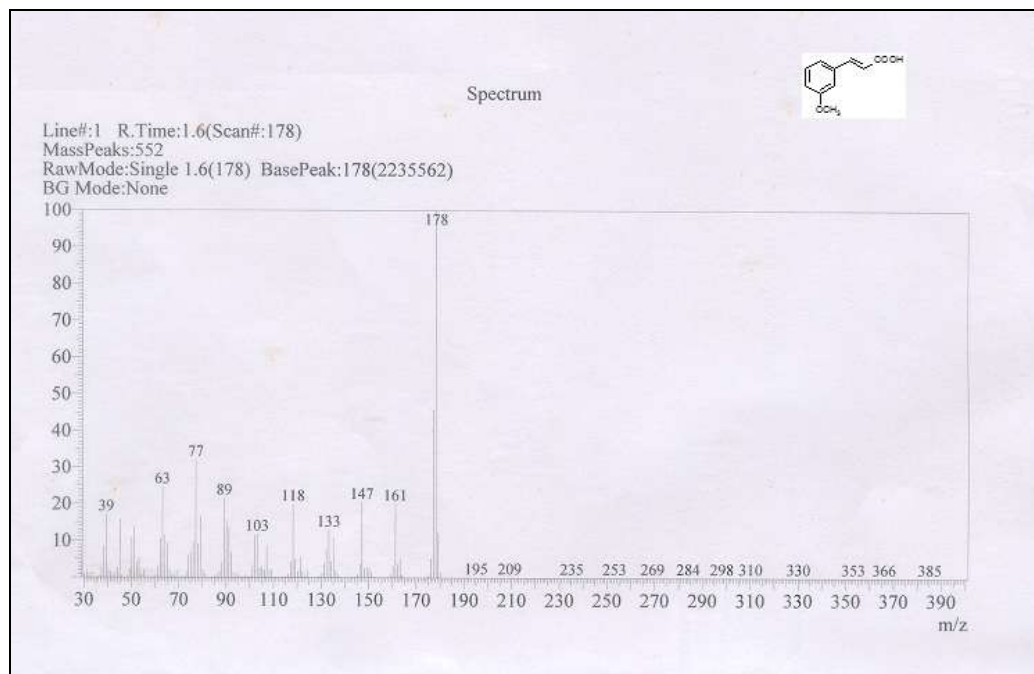

### FT-IR Spectrum

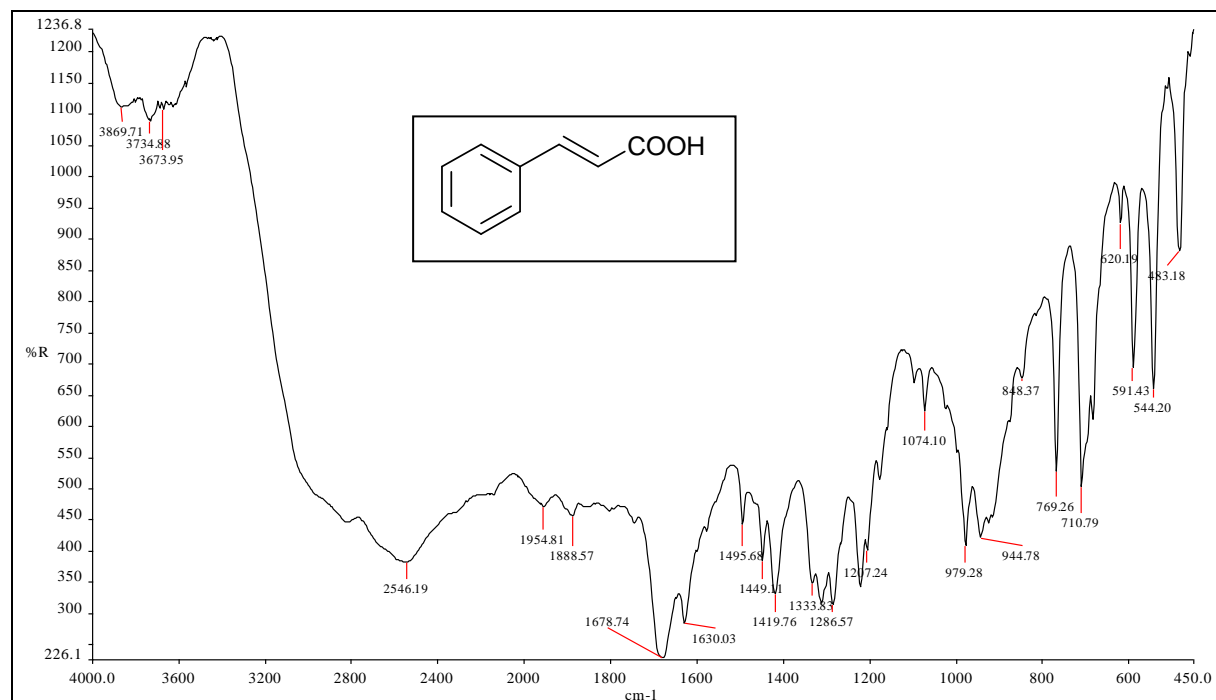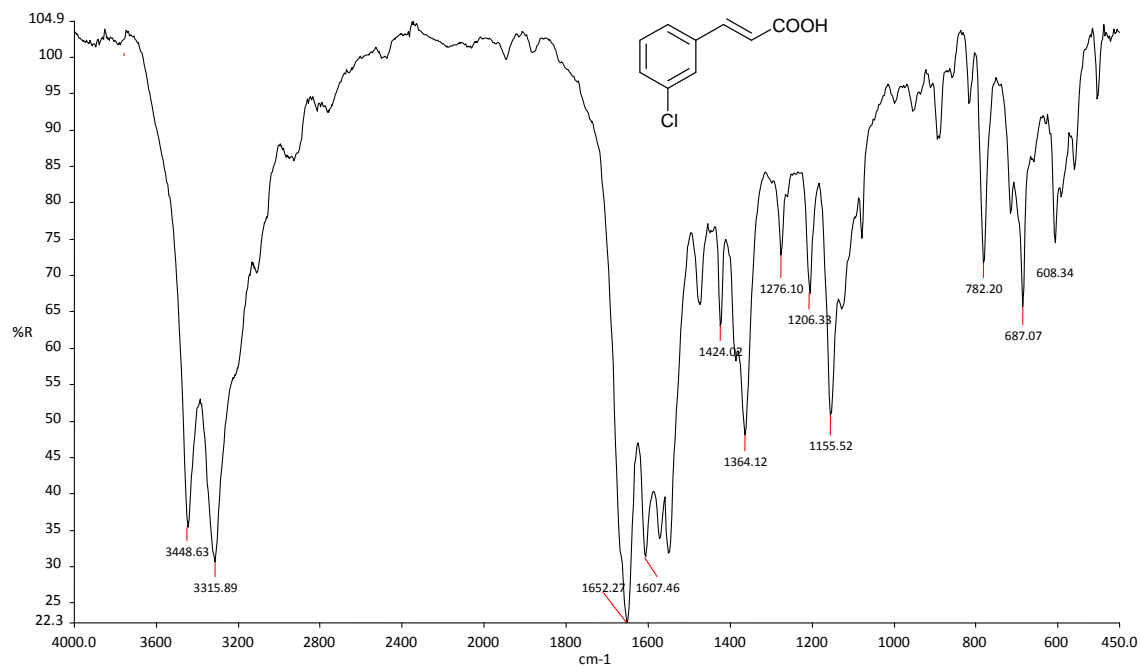



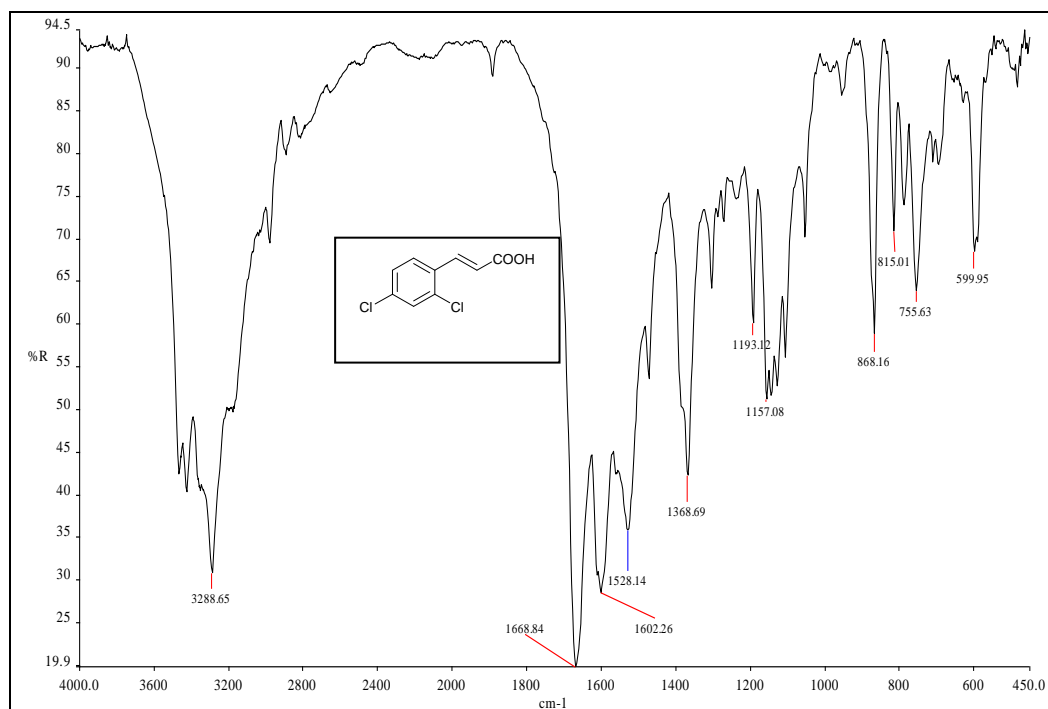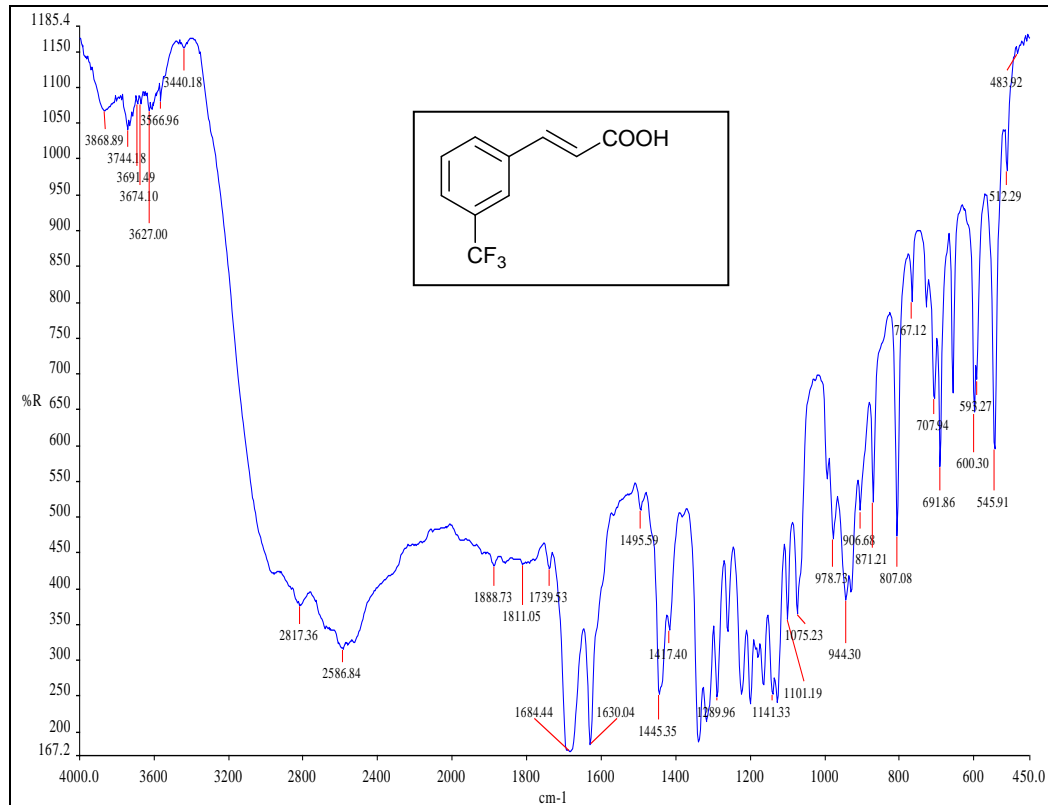

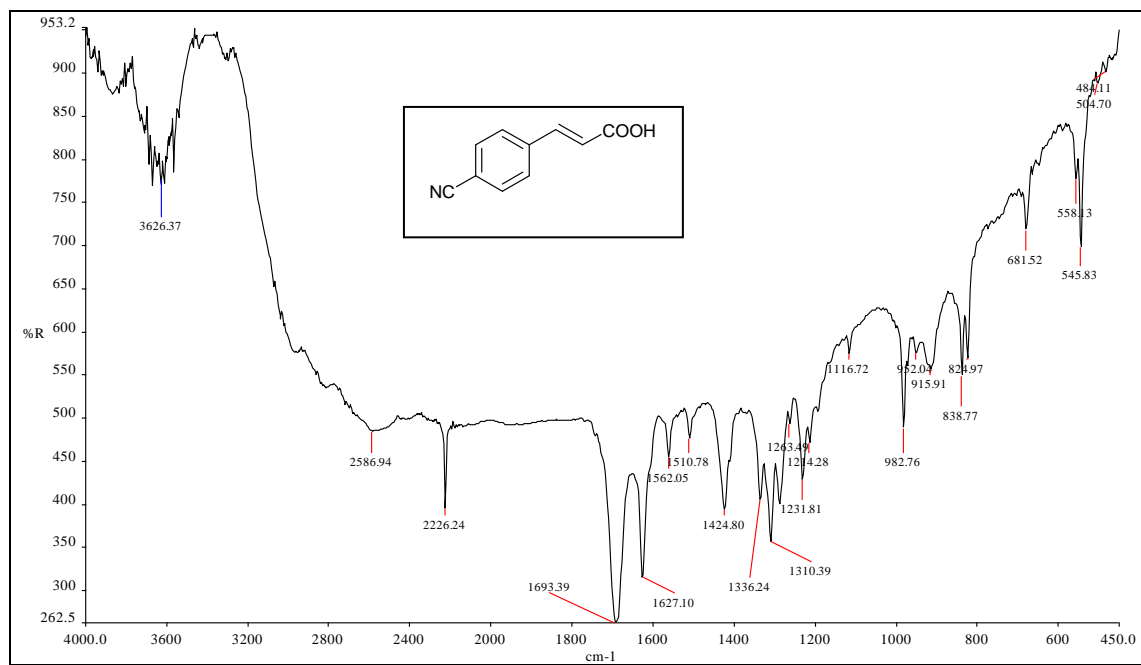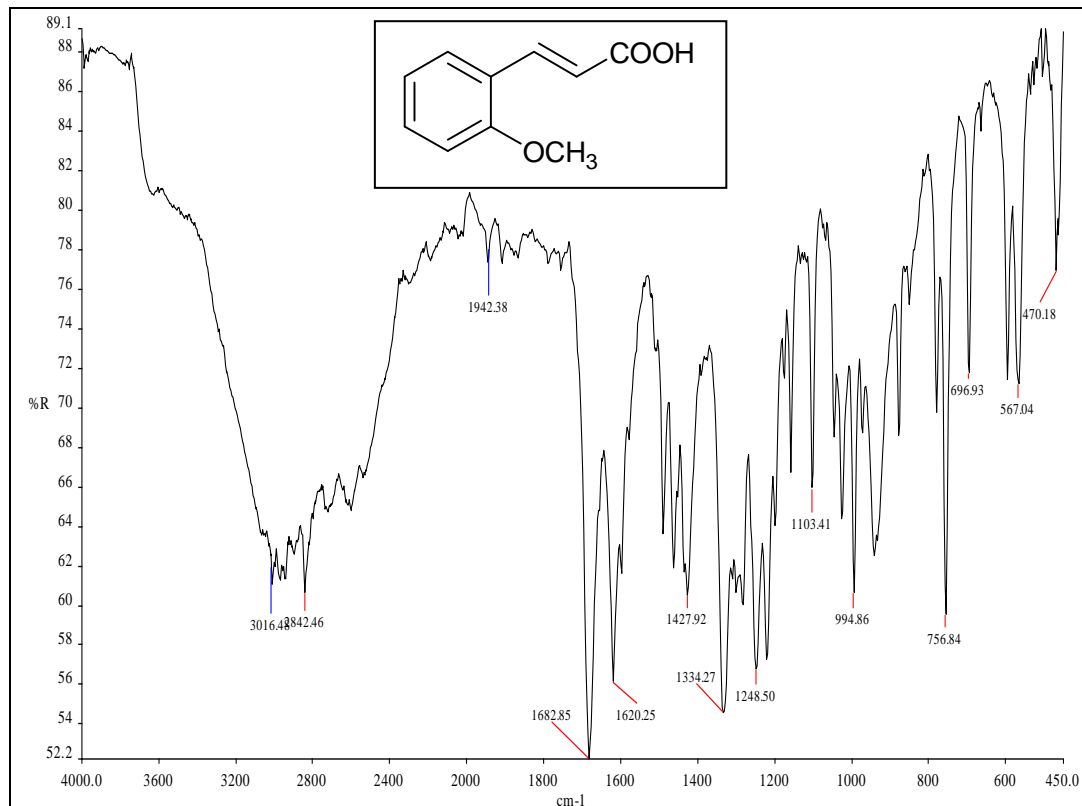

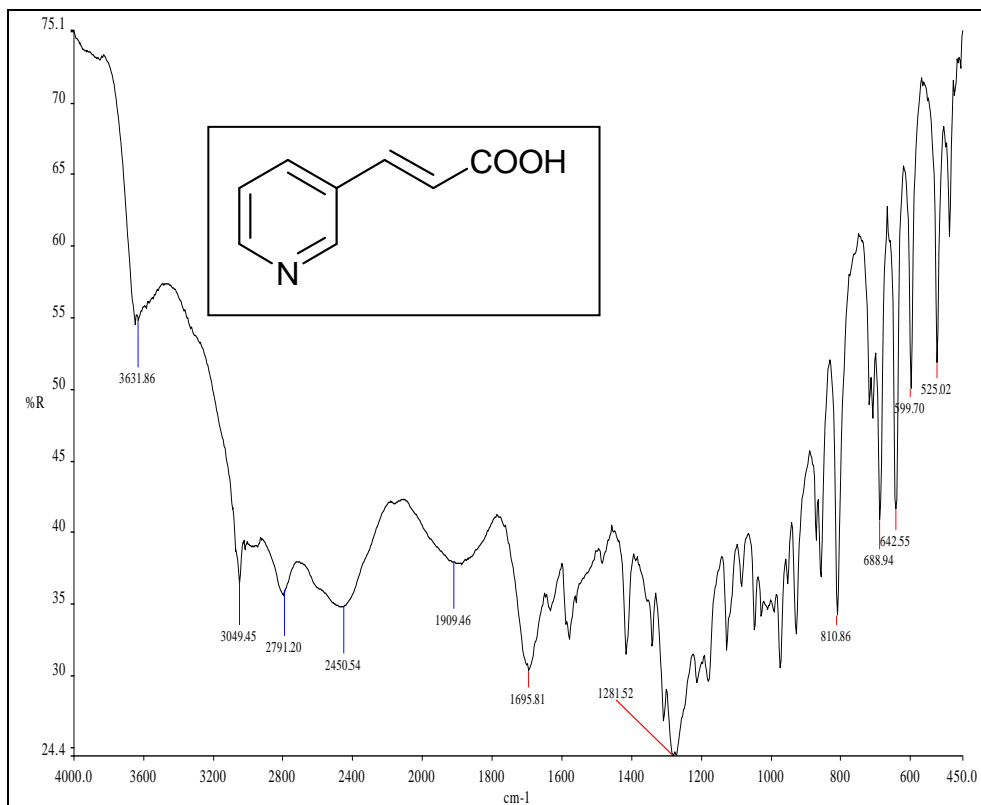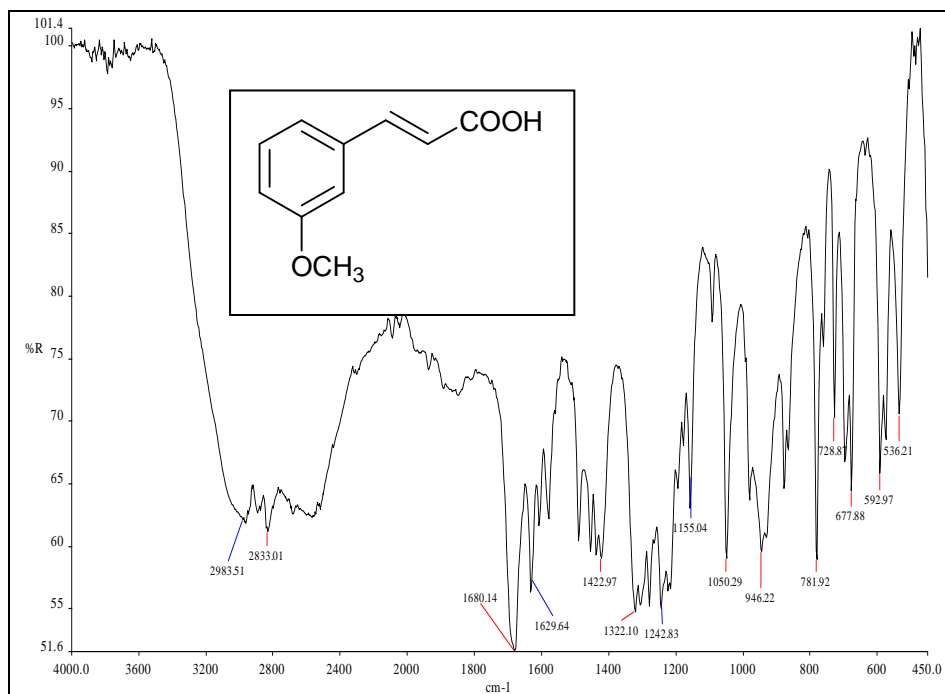

### H-1 NMR Spectrum

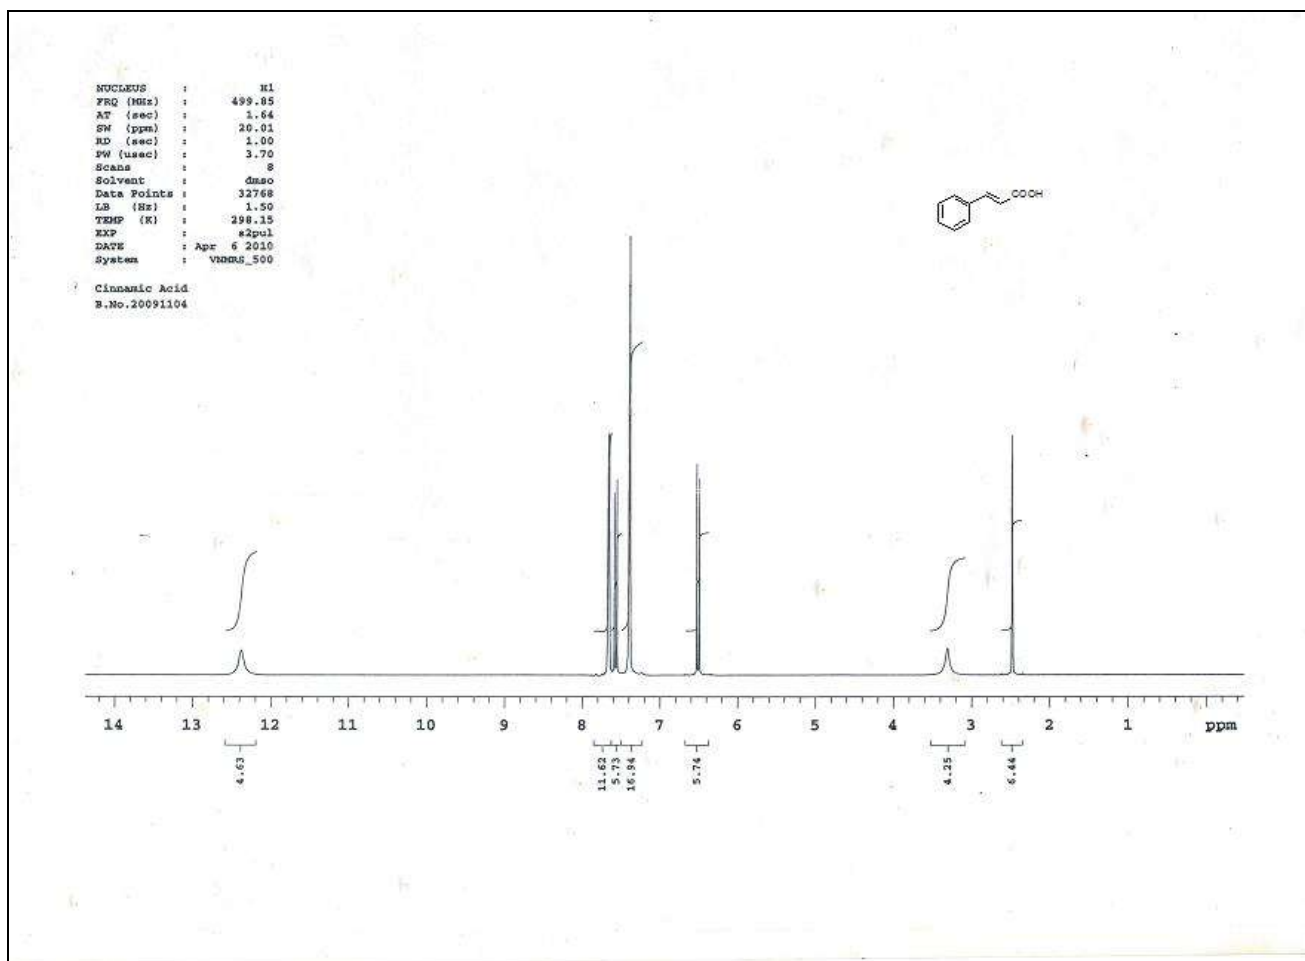

Cinnamic Acid  
B.No.20091104

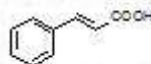

| INDEX | FREQUENCY | PPM    | HEIGHT |
|-------|-----------|--------|--------|
| 1     | 6190.0    | 12.384 | 5.6    |
| 2     | 3832.2    | 7.667  | 54.2   |
| 3     | 3829.7    | 7.662  | 53.3   |
| 4     | 3827.3    | 7.657  | 54.8   |
| 5     | 3793.1    | 7.589  | 41.1   |
| 6     | 3777.2    | 7.557  | 44.1   |
| 7     | 3708.9    | 7.420  | 3.3    |
| 8     | 3697.3    | 7.397  | 88.7   |
| 9     | 3694.8    | 7.392  | 99.0   |
| 10    | 3262.7    | 6.527  | 47.8   |
| 11    | 3246.8    | 6.496  | 44.3   |
| 12    | 1653.8    | 3.309  | 6.1    |
| 13    | 1241.2    | 2.483  | 54.1   |

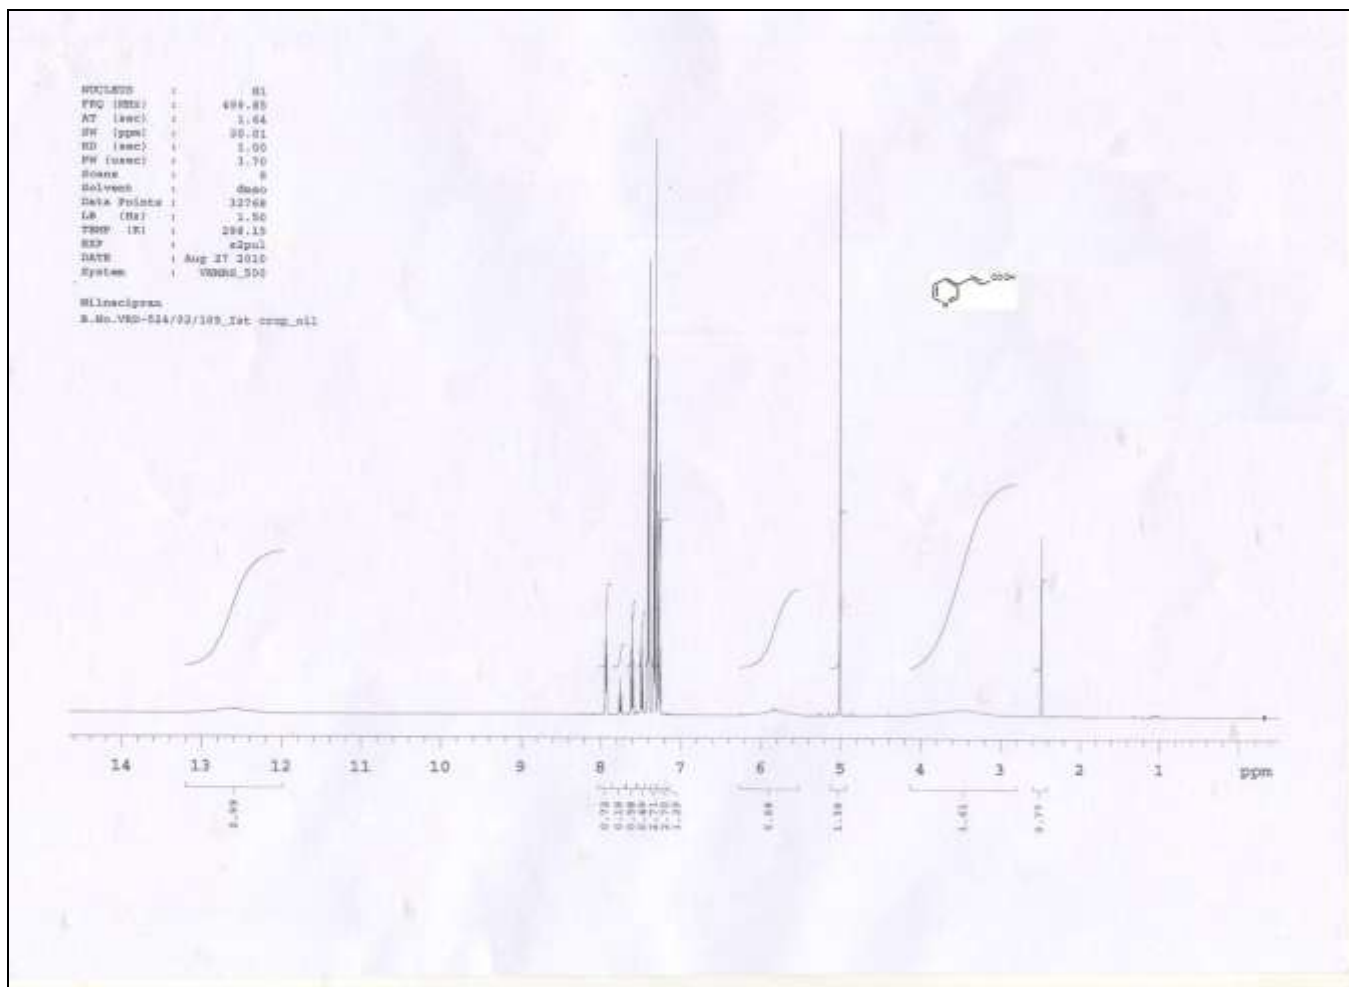

Milnacipran  
B.No.VRD-524/02/109\_Ist crop\_oil

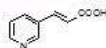

| INDEX | FREQUENCY | PPM    | HEIGHT | INDEX | FREQUENCY | PPM   | HEIGHT |
|-------|-----------|--------|--------|-------|-----------|-------|--------|
| 1     | 6318.1    | 12.640 | 26.7   | 43    | 1676.4    | 3.354 | 29.5   |
| 2     | 3970.7    | 7.944  | 432.4  | 44    | 1244.9    | 2.491 | 364.1  |
| 3     | 3965.8    | 7.934  | 395.8  | 45    | 1243.1    | 2.487 | 784.9  |
| 4     | 3964.0    | 7.930  | 453.7  | 46    | 1241.2    | 2.483 | 1084.7 |
| 5     | 3959.1    | 7.921  | 352.7  | 47    | 1239.4    | 2.480 | 773.3  |
| 6     | 3882.8    | 7.768  | 96.6   | 48    | 1237.6    | 2.476 | 344.0  |
| 7     | 3881.6    | 7.766  | 56.5   |       |           |       |        |
| 8     | 3875.5    | 7.753  | 222.3  |       |           |       |        |
| 9     | 3869.4    | 7.741  | 76.7   |       |           |       |        |
| 10    | 3868.2    | 7.739  | 128.8  |       |           |       |        |
| 11    | 3809.0    | 7.620  | 334.5  |       |           |       |        |
| 12    | 3801.0    | 7.604  | 589.3  |       |           |       |        |
| 13    | 3793.1    | 7.589  | 327.1  |       |           |       |        |
| 14    | 3748.5    | 7.499  | 348.0  |       |           |       |        |
| 15    | 3740.6    | 7.484  | 526.8  |       |           |       |        |
| 16    | 3732.7    | 7.468  | 252.3  |       |           |       |        |
| 17    | 3712.5    | 7.427  | 41.5   |       |           |       |        |
| 18    | 3702.8    | 7.408  | 2140.9 |       |           |       |        |
| 19    | 3695.4    | 7.393  | 2730.6 |       |           |       |        |
| 20    | 3687.5    | 7.377  | 30.4   |       |           |       |        |
| 21    | 3668.6    | 7.339  | 1443.1 |       |           |       |        |
| 22    | 3661.9    | 7.326  | 3461.0 |       |           |       |        |
| 23    | 3660.0    | 7.322  | 1364.5 |       |           |       |        |
| 24    | 3653.9    | 7.310  | 1785.0 |       |           |       |        |
| 25    | 3639.3    | 7.281  | 1221.8 |       |           |       |        |
| 26    | 3638.1    | 7.278  | 699.7  |       |           |       |        |
| 27    | 3634.4    | 7.271  | 471.9  |       |           |       |        |
| 28    | 3632.0    | 7.266  | 1518.8 |       |           |       |        |
| 29    | 3629.5    | 7.261  | 293.6  |       |           |       |        |
| 30    | 3626.5    | 7.255  | 250.6  |       |           |       |        |
| 31    | 3624.6    | 7.252  | 397.4  |       |           |       |        |
| 32    | 3623.4    | 7.249  | 232.7  |       |           |       |        |
| 33    | 2920.3    | 5.842  | 41.4   |       |           |       |        |
| 34    | 2909.9    | 5.822  | 44.5   |       |           |       |        |
| 35    | 2504.0    | 5.010  | 3521.5 |       |           |       |        |
| 36    | 1791.8    | 3.985  | 32.0   |       |           |       |        |
| 37    | 1745.4    | 3.492  | 33.0   |       |           |       |        |
| 38    | 1717.3    | 3.436  | 34.0   |       |           |       |        |
| 39    | 1710.6    | 3.422  | 33.8   |       |           |       |        |
| 40    | 1694.7    | 3.390  | 30.9   |       |           |       |        |
| 41    | 1688.0    | 3.377  | 29.7   |       |           |       |        |
| 42    | 1683.1    | 3.367  | 29.7   |       |           |       |        |

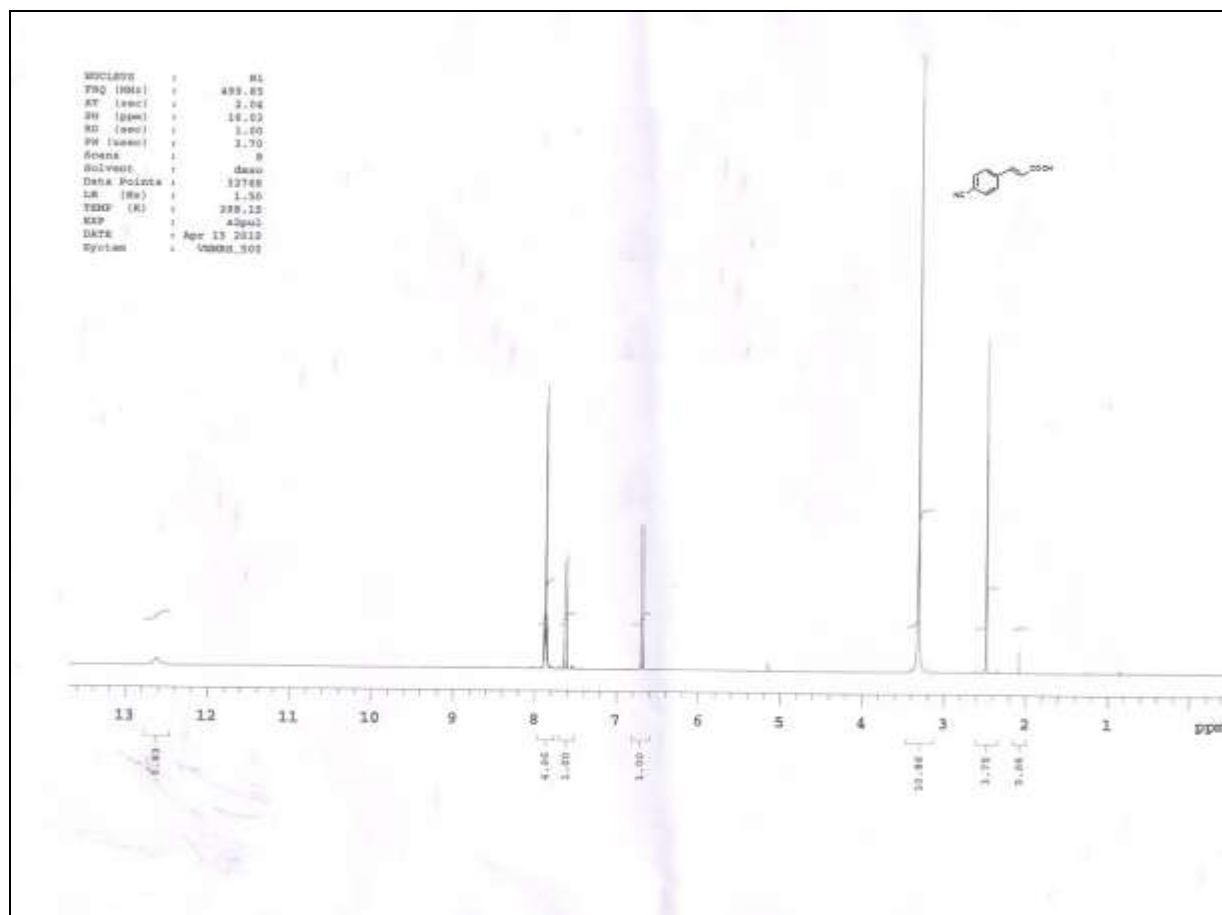



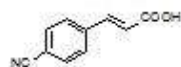

| INDEX | FREQUENCY | PPM    | HEIGHT |
|-------|-----------|--------|--------|
| 1     | 6309.6    | 12.623 | 2.6    |
| 2     | 3944.4    | 7.891  | 21.5   |
| 3     | 3942.5    | 7.887  | 10.4   |
| 4     | 3938.1    | 7.879  | 15.2   |
| 5     | 3935.6    | 7.874  | 101.4  |
| 6     | 3930.8    | 7.864  | 108.7  |
| 7     | 3924.4    | 7.851  | 9.2    |
| 8     | 3922.0    | 7.846  | 21.3   |
| 9     | 3917.6    | 7.838  | 1.7    |
| 10    | 3818.3    | 7.639  | 40.6   |
| 11    | 3802.1    | 7.607  | 43.4   |
| 12    | 3352.7    | 6.707  | 55.2   |
| 13    | 3336.5    | 6.675  | 56.1   |
| 14    | 2572.1    | 5.146  | 3.2    |
| 15    | 1656.1    | 3.313  | 246.0  |
| 16    | 1244.8    | 2.490  | 40.4   |
| 17    | 1242.9    | 2.486  | 93.4   |
| 18    | 1240.9    | 2.483  | 128.0  |
| 19    | 1238.9    | 2.479  | 82.5   |
| 20    | 1237.5    | 2.476  | 37.5   |
| 21    | 1040.9    | 2.082  | 8.6    |

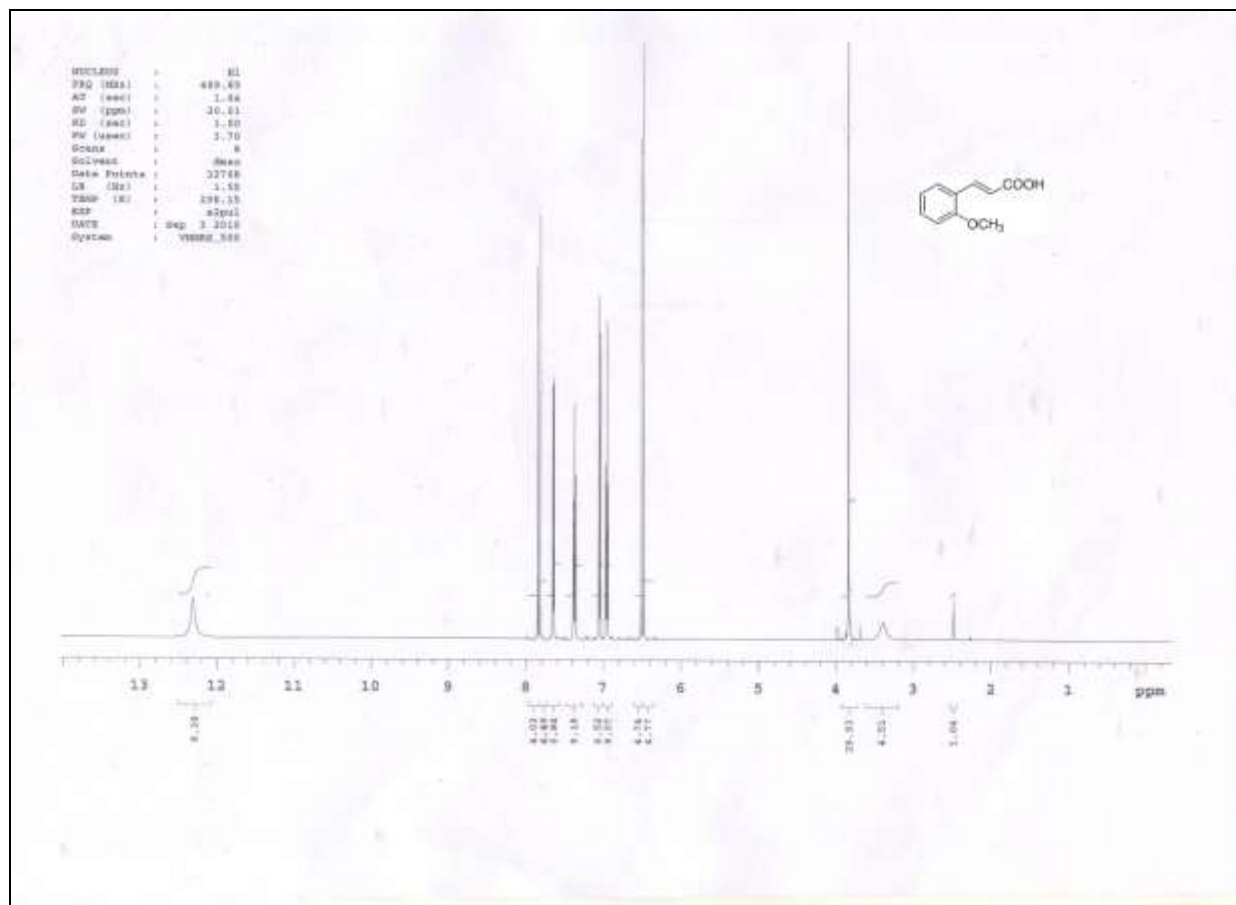

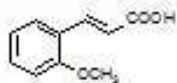

| INDEX | FREQUENCY | PPM    | HEIGHT |
|-------|-----------|--------|--------|
| 1     | 6155.8    | 12.315 | 7.4    |
| 2     | 3922.5    | 7.847  | 71.2   |
| 3     | 3906.6    | 7.816  | 81.2   |
| 4     | 3827.3    | 7.657  | 47.9   |
| 5     | 3825.4    | 7.653  | 48.7   |
| 6     | 3819.3    | 7.641  | 49.4   |
| 7     | 3818.1    | 7.639  | 50.2   |
| 8     | 3694.2    | 7.391  | 22.0   |
| 9     | 3692.4    | 7.387  | 26.0   |
| 10    | 3685.1    | 7.372  | 45.2   |
| 11    | 3678.4    | 7.359  | 31.3   |
| 12    | 3676.5    | 7.355  | 30.5   |
| 13    | 3527.0    | 7.056  | 65.8   |
| 14    | 3519.1    | 7.040  | 58.6   |
| 15    | 3484.3    | 6.971  | 33.4   |
| 16    | 3476.9    | 6.956  | 60.8   |
| 17    | 3469.0    | 6.940  | 29.7   |
| 18    | 3255.4    | 6.513  | 95.7   |
| 19    | 3239.5    | 6.481  | 117.5  |
| 20    | 1988.3    | 3.978  | 2.5    |
| 21    | 1917.5    | 3.836  | 552.3  |
| 22    | 1843.6    | 3.688  | 2.9    |
| 23    | 1695.9    | 3.393  | 3.2    |
| 24    | 1244.3    | 2.489  | 5.3    |
| 25    | 1242.4    | 2.486  | 7.4    |
| 26    | 1240.6    | 2.482  | 5.5    |
| 27    | 1238.8    | 2.478  | 2.6    |

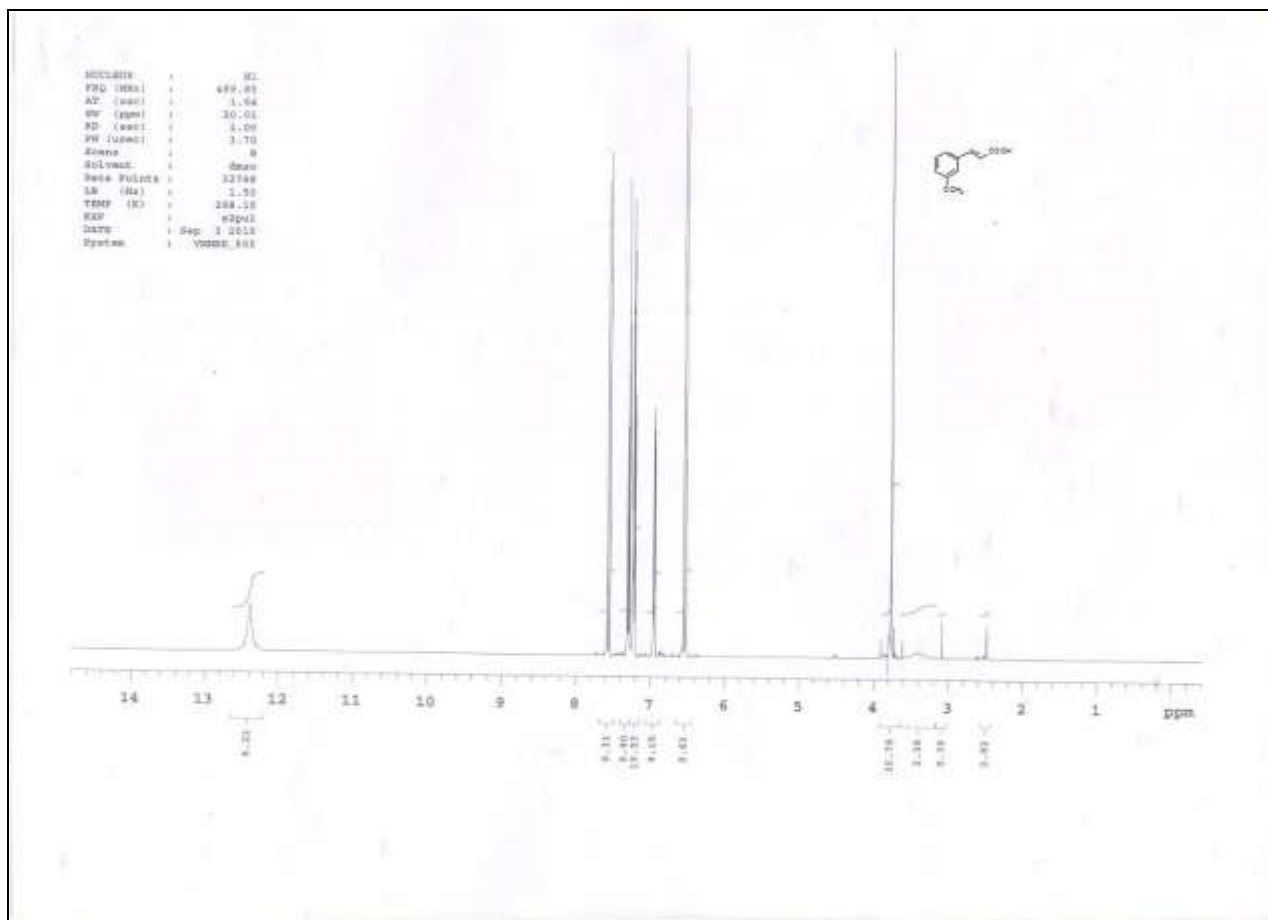

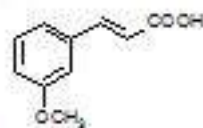

| INDEX | FREQUENCY | PPM    | HEIGHT |
|-------|-----------|--------|--------|
| 1     | 6194.2    | 12.392 | 7.4    |
| 2     | 3785.2    | 7.573  | 75.0   |
| 3     | 3768.7    | 7.540  | 79.8   |
| 4     | 3652.7    | 7.308  | 36.3   |
| 5     | 3644.8    | 7.292  | 75.4   |
| 6     | 3636.8    | 7.276  | 52.9   |
| 7     | 3615.5    | 7.233  | 72.2   |
| 8     | 3613.7    | 7.230  | 64.3   |
| 9     | 3609.4    | 7.221  | 64.1   |
| 10    | 3602.1    | 7.206  | 41.6   |
| 11    | 3478.8    | 6.960  | 39.4   |
| 12    | 3476.3    | 6.955  | 37.6   |
| 13    | 3470.8    | 6.944  | 35.6   |
| 14    | 3468.4    | 6.939  | 33.0   |
| 15    | 3276.7    | 6.556  | 98.9   |
| 16    | 3260.9    | 6.524  | 87.1   |
| 17    | 1900.4    | 3.802  | 3.9    |
| 18    | 1881.5    | 3.764  | 511.9  |
| 19    | 1863.2    | 3.727  | 4.9    |
| 20    | 1543.3    | 3.088  | 5.9    |
| 21    | 1244.3    | 2.489  | 4.2    |
| 22    | 1242.4    | 2.486  | 5.3    |
| 23    | 1240.6    | 2.482  | 4.0    |

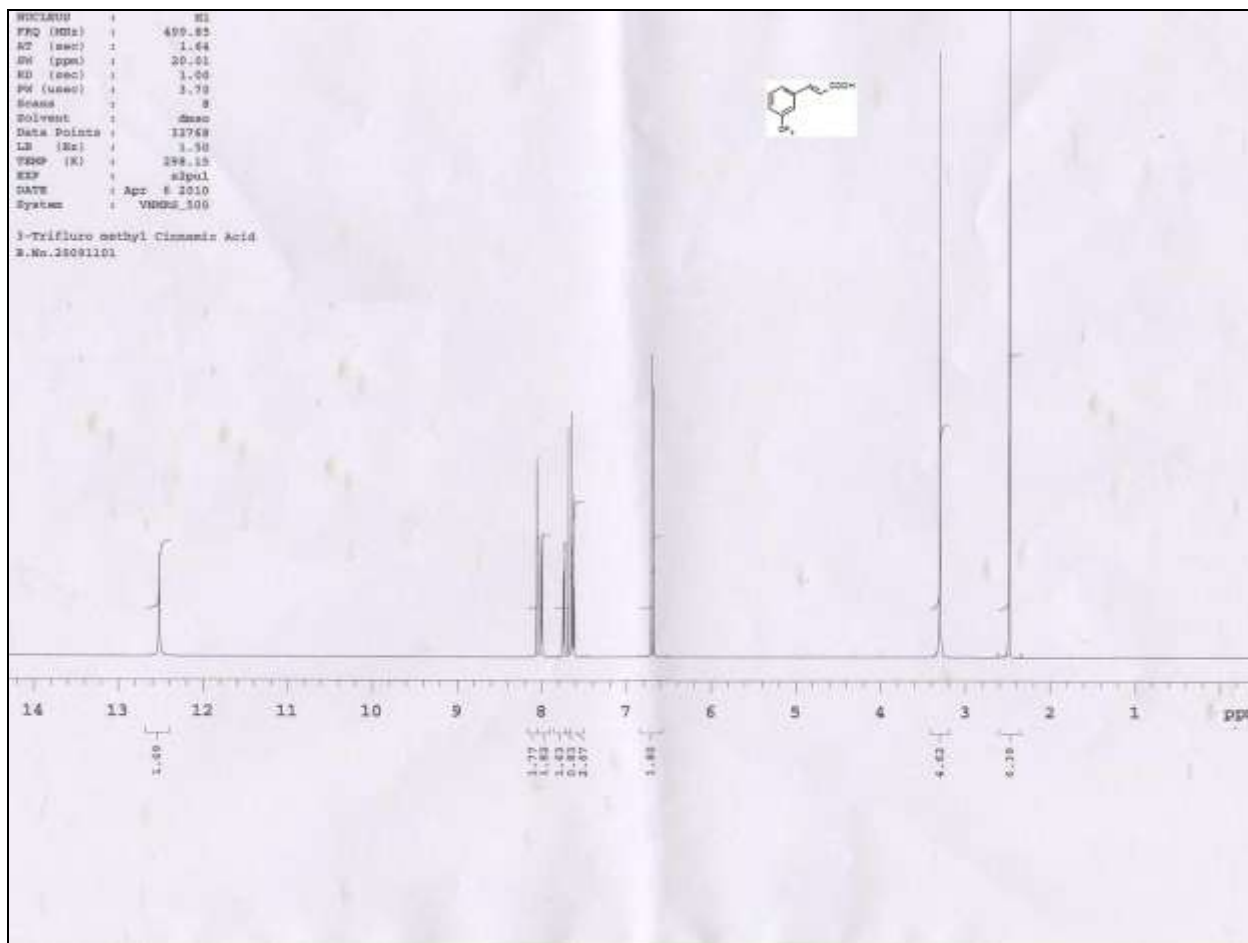

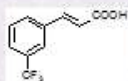

| INDEX | FREQUENCY | PPM    | HEIGHT |
|-------|-----------|--------|--------|
| 1     | 6258.9    | 12.522 | 21.3   |
| 2     | 4028.1    | 8.059  | 41.6   |
| 3     | 4004.9    | 8.012  | 23.9   |
| 4     | 3997.0    | 7.996  | 25.6   |
| 5     | 3871.8    | 7.746  | 18.0   |
| 6     | 3864.5    | 7.731  | 23.9   |
| 7     | 3839.5    | 7.681  | 47.8   |
| 8     | 3823.6    | 7.650  | 50.8   |
| 9     | 3821.2    | 7.645  | 22.6   |
| 10    | 3813.2    | 7.629  | 33.5   |
| 11    | 3805.3    | 7.613  | 14.0   |
| 12    | 3354.3    | 6.711  | 63.2   |
| 13    | 3337.8    | 6.678  | 56.5   |
| 14    | 1650.8    | 3.303  | 126.0  |
| 15    | 1244.9    | 2.491  | 46.2   |
| 16    | 1243.1    | 2.487  | 100.4  |
| 17    | 1241.2    | 2.483  | 139.0  |
| 18    | 1239.4    | 2.480  | 99.2   |
| 19    | 1237.6    | 2.476  | 45.6   |

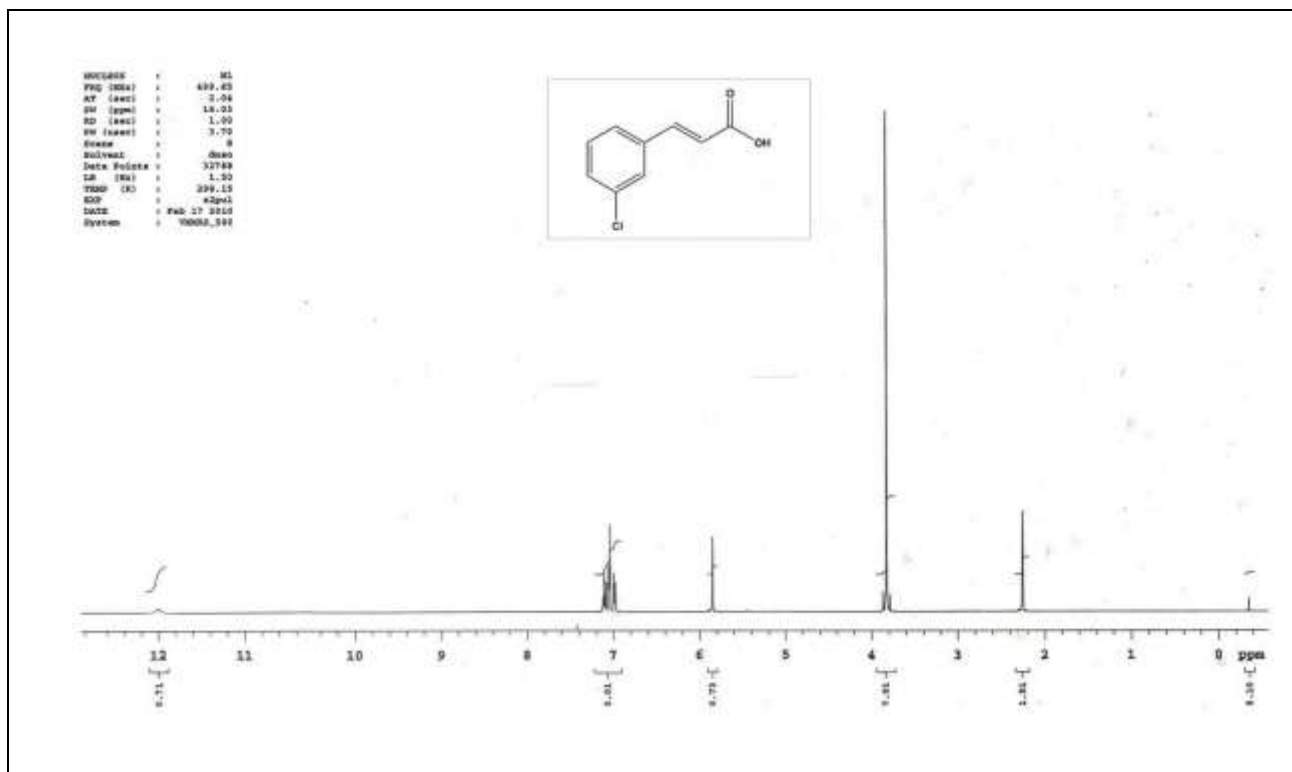



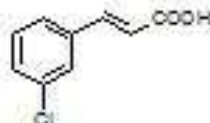

| INDEX | FREQUENCY | PPM    | HEIGHT |
|-------|-----------|--------|--------|
| 1     | 5918.4    | 12.006 | 3.2    |
| 2     | 3553.7    | 7.110  | 10.2   |
| 3     | 3546.4    | 7.095  | 7.9    |
| 4     | 3545.4    | 7.093  | 8.2    |
| 5     | 3529.2    | 7.061  | 12.1   |
| 6     | 3522.4    | 7.047  | 23.3   |
| 7     | 3497.9    | 6.998  | 10.4   |
| 8     | 3490.6    | 6.983  | 8.1    |
| 9     | 2924.3    | 5.850  | 20.0   |
| 10    | 1912.4    | 3.826  | 241.0  |
| 11    | 1127.9    | 2.257  | 25.3   |
| 12    | 1126.5    | 2.254  | 26.9   |

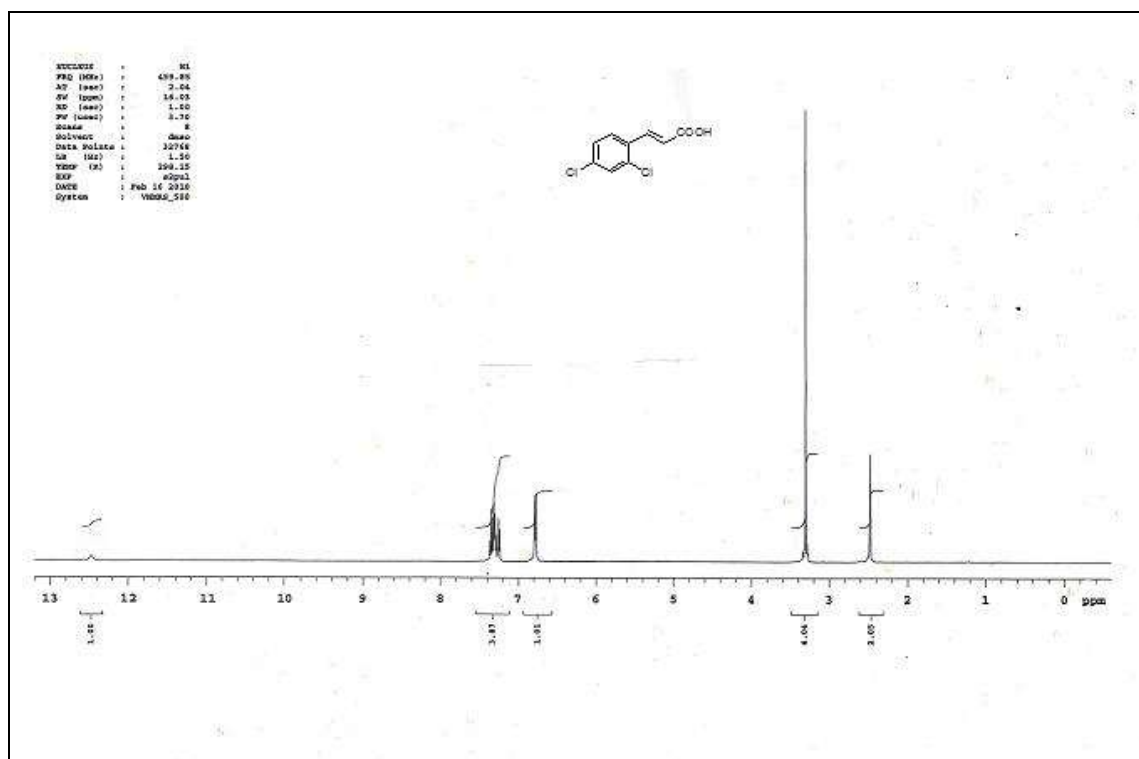

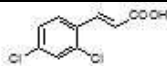

| INDEX | FREQUENCY | PPM    | HEIGHT |
|-------|-----------|--------|--------|
| 1     | 6196.2    | 12.482 | 3.1    |
| 2     | 3683.8    | 7.370  | 16.7   |
| 3     | 3676.0    | 7.354  | 42.2   |
| 4     | 3668.6    | 7.340  | 35.8   |
| 5     | 3658.8    | 7.320  | 50.5   |
| 6     | 3652.5    | 7.307  | 38.6   |
| 7     | 3644.7    | 7.292  | 21.3   |
| 8     | 3629.0    | 7.260  | 34.9   |
| 9     | 3621.7    | 7.246  | 26.0   |
| 10    | 3396.7    | 6.796  | 53.4   |
| 11    | 3388.4    | 6.779  | 55.3   |
| 12    | 1671.3    | 3.344  | 8.2    |
| 13    | 1670.3    | 3.342  | 8.9    |
| 14    | 1661.0    | 3.323  | 11.8   |
| 15    | 1653.7    | 3.308  | 363.7  |
| 16    | 1645.8    | 3.293  | 8.9    |
| 17    | 1641.9    | 3.285  | 15.1   |
| 18    | 1241.4    | 2.484  | 84.8   |
| 19    | 1239.9    | 2.481  | 86.0   |

### <sup>1</sup>H-NMR of DES Before reaction:

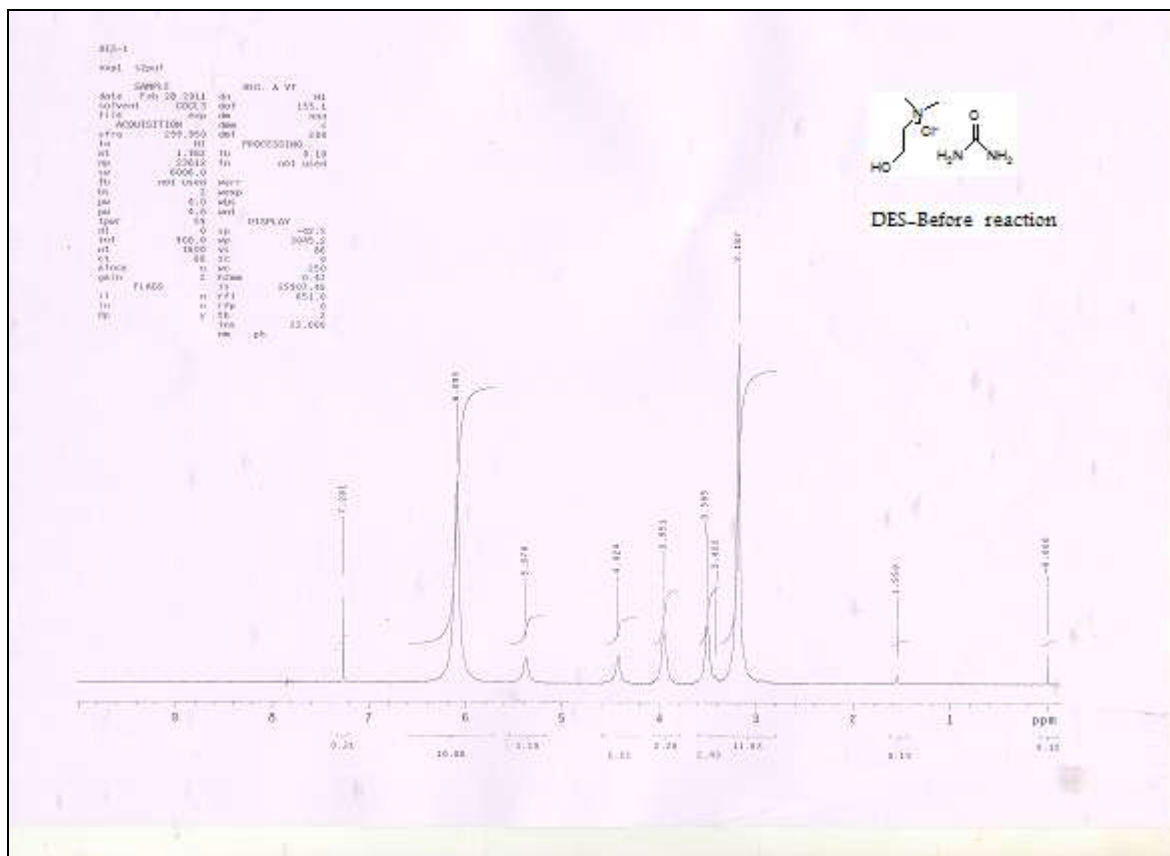

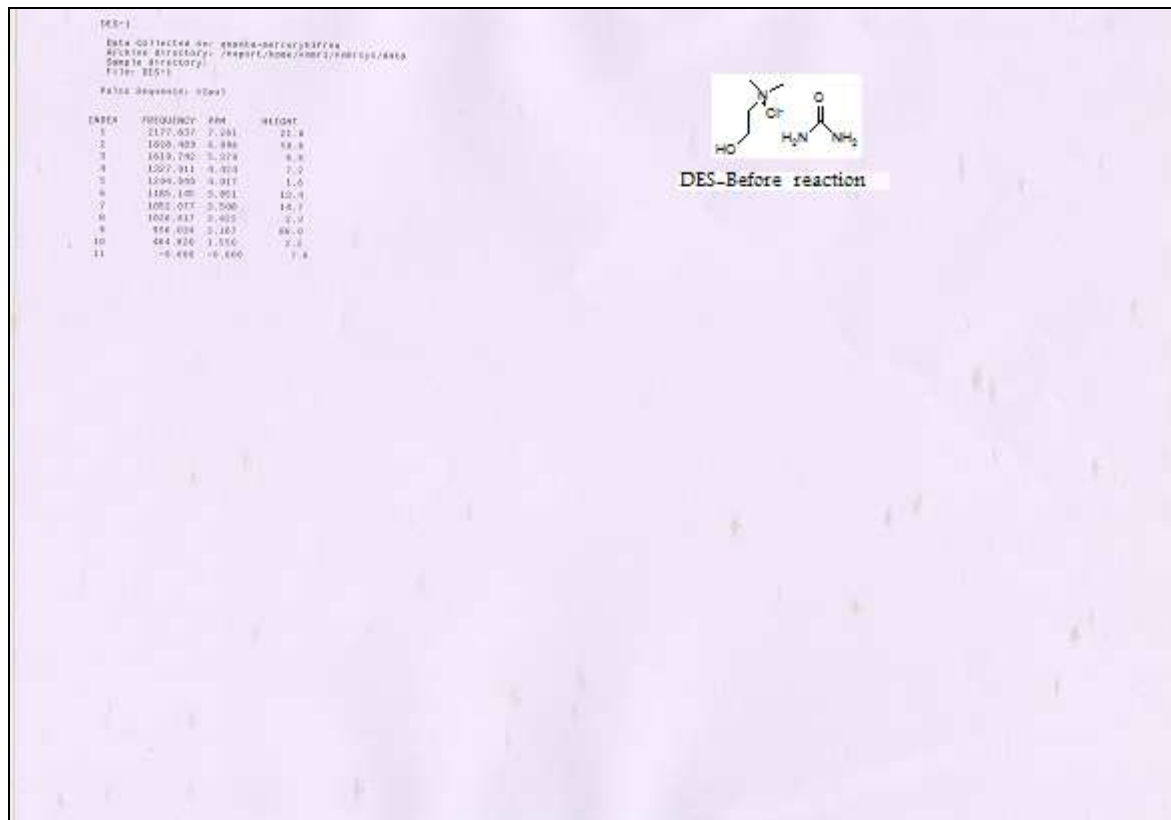

<sup>13</sup>C-NMR of DES Before reaction:

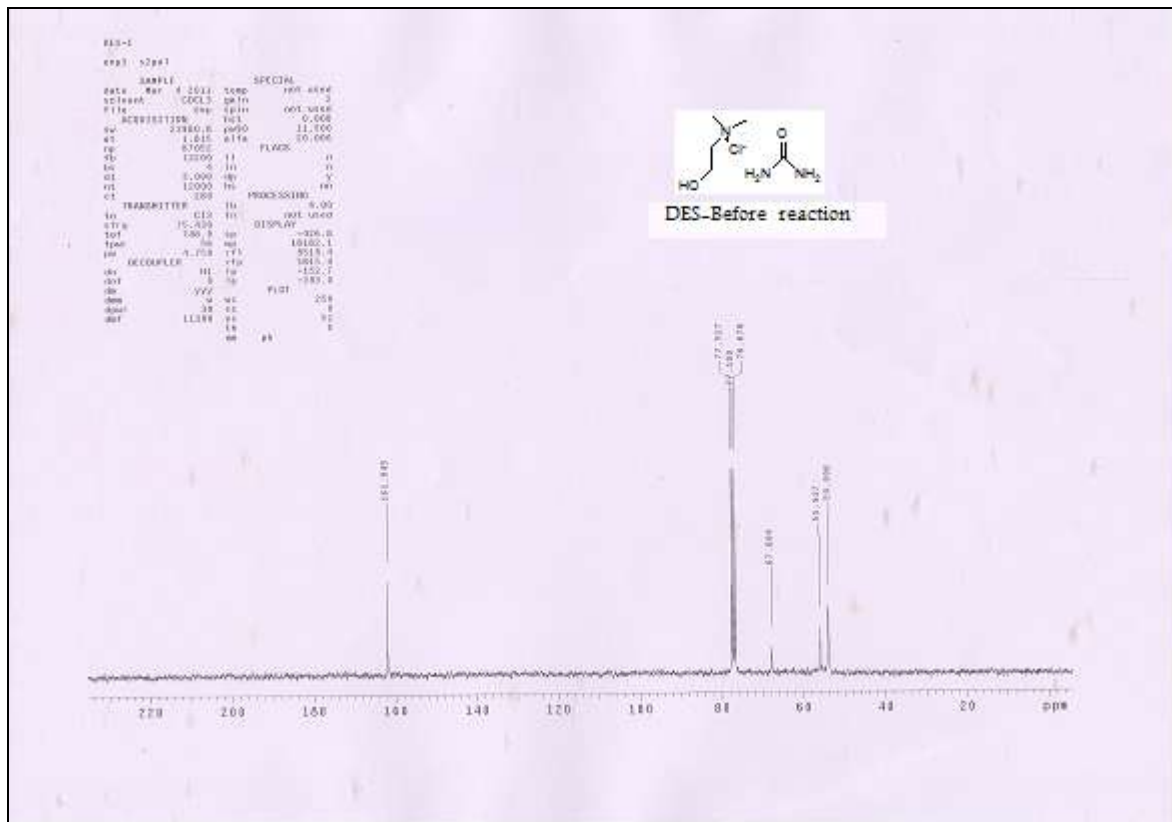

### <sup>1</sup>H-NMR of DES after reaction:

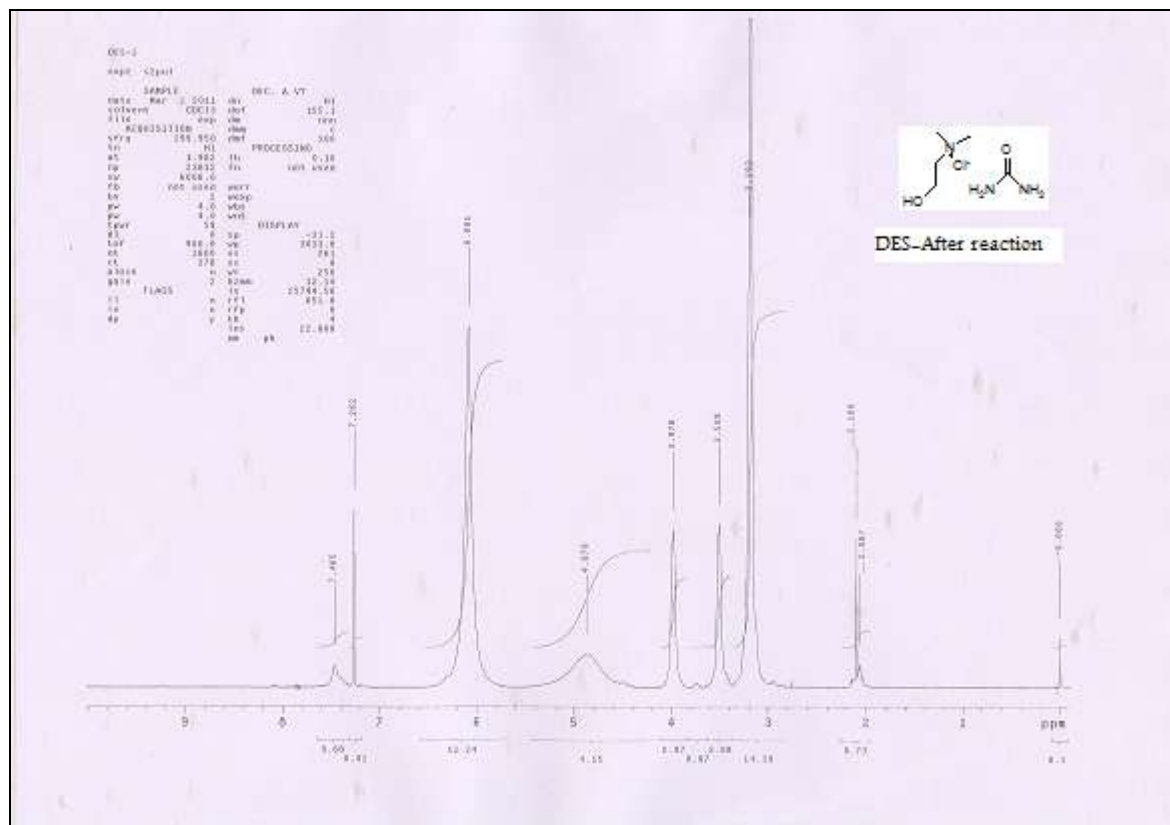

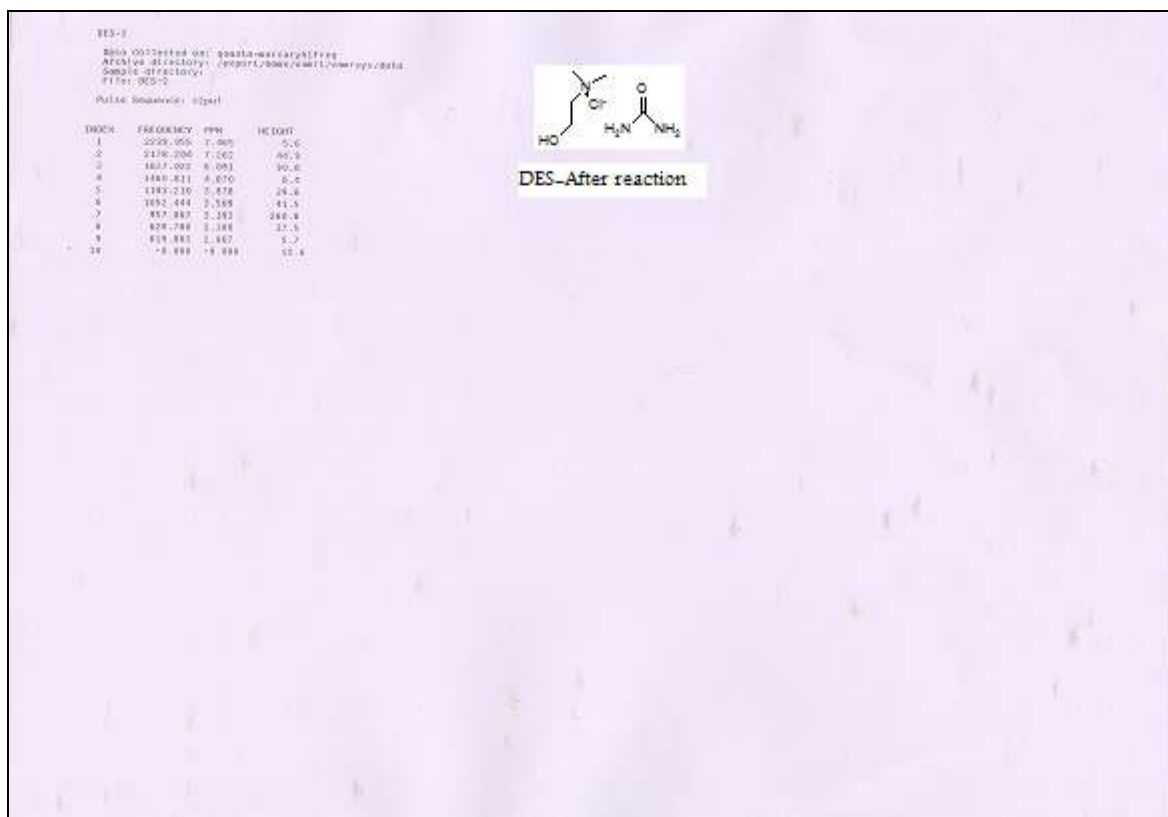



### $^{13}\text{C}$ -NMR of DES after reaction:

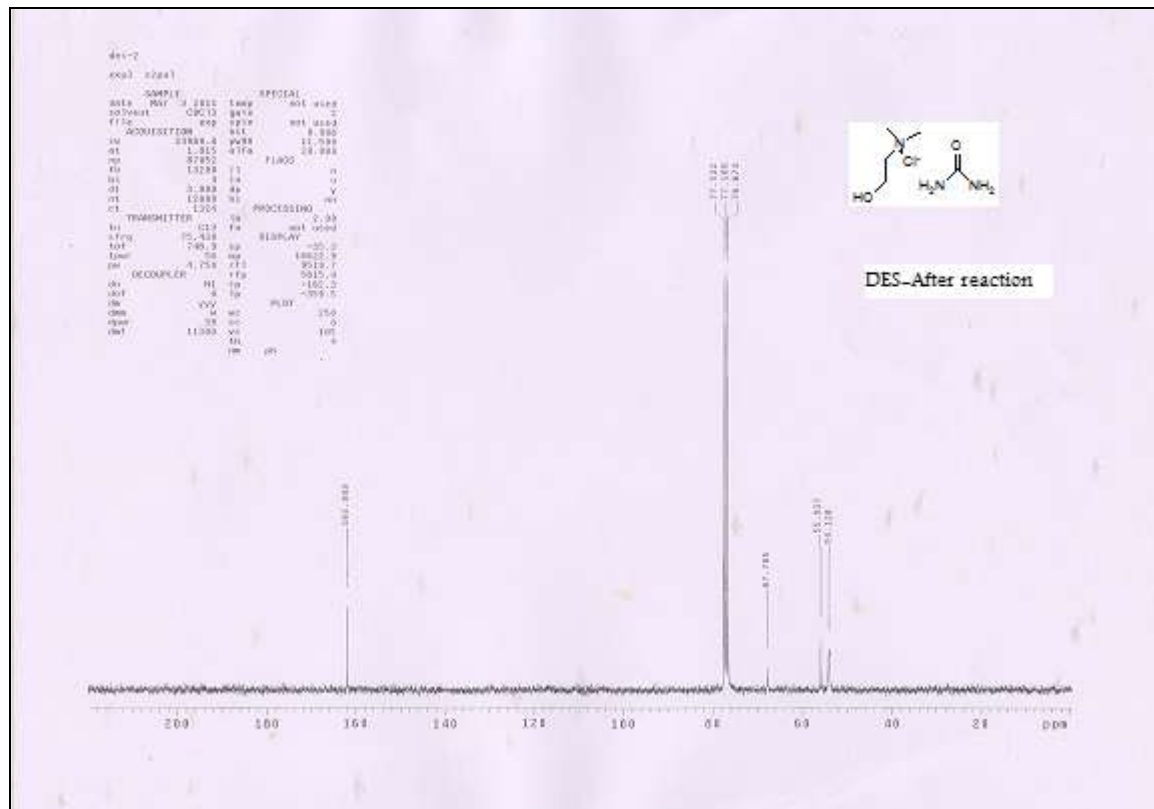

Supplement: c0gc00712a.pdf [file c0gc00712a.pdf]
